# Supplementary material
Source: publisher figshare collection journal article supplement (https://gsapubs.figshare.com/ndownloader/files/28157196)
Supplement: Supplementary file 1 [file 28157196]

## Sheet: Sheet1
Table S7 In situ zircon Hf and O isotopic data for the biotite granites, granite porphyry dykes and MMEs
Spot		206Pb/238U age (Ma)	176Yb/177Hf	176Lu/177Hf	176Hf/177Hf	1σ	εHf(0)	εHf(t)	TDM (Ma)	TDMc (Ma)		δ18O (‰）	2σ
Equigranular biotite granite (ZK3-1-27)
1		96.1	0.0787179	0.00245533	0.282559	1.14e-05	-7.98391	-6.10209	1019.57	1237.86		7.79995	0.210243
2		97.5	0.0506	0.00174502	0.282573	1.30351e-05	-7.47986	-5.43073	979.548	1208.57		7.76754	0.144723
4		97.7	0.0508453	0.00181368	0.282581	1.29741e-05	-7.2161	-5.16502	970.647	1195.22		6.18914	0.260318
5		91.2	0.0991126	0.00294772	0.282532	1.1037e-05	-8.94276	-7.10105	1073.76	1288.29		7.06902	0.243616
6		93.5	0.0245561	0.000817863	0.282566	9.34735e-06	-7.73566	-5.71143	965.723	1219.96		7.79064	0.209492
7		93.9	0.0491616	0.00160544	0.282584	1.05849e-05	-7.10607	-5.12191	960.754	1189.97		8.29932	0.23416
11		91.5	0.02469	0.00087328	0.282483	1.21857e-05	-10.6726	-8.74326	1083.43	1371.31		7.86877	0.268259
13		95.4	0.0873851	0.00306516	0.282451	1.30055e-05	-11.8003	-9.8766	1197.21	1433.27		8.28519	0.271311
14		92.8	0.142916	0.00463007	0.282544	1.16404e-05	-8.50824	-6.73369	1107.61	1270.47		7.98996	0.264932
15		90.4	0.0482841	0.00157821	0.282601	1.02204e-05	-6.50889	-4.5975	935.916	1160.28		8.1301	0.300828
16		93.4	0.060257	0.00197764	0.282602	1.01597e-05	-6.47859	-4.5284	944.852	1159.11		7.27449	0.19871
17		94	0.0806927	0.00282255	0.282531	8.25485e-06	-8.98751	-7.07719	1071.89	1289.56		7.01716	0.194449
18		91.2	0.0372486	0.00125398	0.282559	1.09596e-05	-7.98344	-6.03568	986.878	1234.53		7.48294	0.302617
19		95.7	0.0631707	0.00214798	0.282602	9.32815e-06	-6.47991	-4.49199	949.307	1159.1		8.54402	0.241227
22		714	0.0339683	0.00115052	0.28226	1.19385e-05	-18.5479	-3.14714	1404.27	1597.49		8.52407	0.136991
23		669	0.0953104	0.00293055	0.282283	1.30309e-05	-17.7455	-4.11117	1440.43	1609.18		6.45545	0.32021
Porphyritic biotite granite (ZK10-1-32)
1		94.1	0.0297345	0.000983988	0.282527	9.37691e-06	-9.14045	-7.26711	1025.79	1294.07		8.26674	0.296037
2		96.3	0.0981475	0.00331707	0.282527	7.68466e-06	-9.12121	-7.23969	1092.5	1297.77		6.75268	0.154582
3		95.1	0.113312	0.00394095	0.282524	9.84999e-06	-9.22153	-7.37234	1116.4	1304.6		7.99245	0.143797
4		92	0.089471	0.00317128	0.282494	1.16543e-05	-10.2826	-8.40837	1136.93	1356.73		8.92453	0.290071
7		95.1	0.0998954	0.00345343	0.282474	9.79964e-06	-10.9889	-9.09542	1175.97	1393.12		8.41186	0.230987
8		92.9	0.0700338	0.00240039	0.282528	9.30096e-06	-9.08896	-7.19273	1063.63	1293.99		8.2443	0.14908
9		98.6	0.0386065	0.00131873	0.282563	9.97562e-06	-7.8622	-5.75933	983.723	1226.48		8.63379	0.208989
10		90.1432	0.0255991	0.000838282	0.282527	1.13347e-05	-9.11718	-7.16718	1020.93	1291.58		7.9361	0.195635
12		91.1	0.0648295	0.0021473	0.28254	8.91409e-06	-8.67677	-6.78448	1039.39	1272.47		8.54901	0.287325
13		97.9	0.0645161	0.0022321	0.282616	9.11954e-06	-5.95939	-3.93133	930.076	1132.2		8.37546	0.218864
15		91.6	0.0474793	0.00166067	0.282533	9.34717e-06	-8.90427	-6.97317	1034.95	1282.61		8.09419	0.249625
16		92.9	0.0606281	0.00212067	0.28254	9.84822e-06	-8.66214	-6.73057	1038.03	1271.2		8.07225	0.250264
17		90.0087	0.0218193	0.000725852	0.282584	1.06403e-05	-7.10507	-5.15089	938.479	1188.48		8.03933	0.185544
18		92.5	0.0622188	0.00208741	0.282535	9.57554e-06	-8.85465	-6.93086	1044.97	1281.05		8.63379	0.186662
19		98.8	0.087722	0.00296814	0.282524	1.10485e-05	-9.23662	-7.23741	1086.68	1301.63		7.4758	0.224329
20		96.5	0.0842495	0.00312143	0.282567	1.03384e-05	-7.70166	-5.76002	1026.75	1224.27		7.27931	0.229687
21		89.7	0.0327219	0.00109839	0.282547	1.03542e-05	-8.43119	-6.56886	1000.65	1258.21		8.18794	0.193403
Granite porphyry dyke (GF-05)
1		82.5	0.0934208	0.00346817	0.28253	1.48616e-05	-9.01677	-7.3764	1092.74	1295.21		8.15083	0.269701
2		82.7	0.0998916	0.00357266	0.282541	1.37778e-05	-8.61543	-6.97644	1078.88	1274.95		7.80523	0.231396
4		84.8	0.0774187	0.00267784	0.282512	1.45865e-05	-9.6464	-7.91569	1094.97	1324.85		6.53354	0.13883
5		83.1	0.101371	0.00381281	0.282601	1.29086e-05	-6.5038	-4.86864	995.606	1167.67		8.10096	0.220405
7		87.9	0.0796061	0.00278102	0.282497	1.21362e-05	-10.1696	-8.38024	1119.9	1351.08		7.90098	0.317994
11		83.2	0.0661359	0.00208671	0.282508	1.00354e-05	-9.80744	-8.07705	1083.9	1331.96		7.48806	0.286695
12		89.4	0.0672914	0.00218697	0.282585	1.04937e-05	-7.07444	-5.21976	974.743	1191.15		7.90747	0.272526
13		87.4	0.0865763	0.00331694	0.282481	1.5393e-05	-10.7436	-8.99714	1161.08	1381.84		7.7389	0.225019
14		88.2	0.0695037	0.00255905	0.282579	1.2398e-05	-7.27066	-5.46313	992.911	1202.49		6.8547	0.140397
15		85.7	0.0280083	0.00100307	0.282525	1.46777e-05	-9.2068	-7.36158	1028.94	1297.87		7.95285	0.208405
16		81.8	0.0975923	0.00342036	0.282573	8.86032e-06	-7.4989	-5.86845	1026.83	1217.76		7.7	0.212709
17		87.2	0.0547226	0.00199785	0.282824	1.27871e-05	1.36763	3.1891	623.647	1290.84		6.59039	0.176547
18		83.7	0.0279631	0.000939877	0.282786	1.24013e-05	0.0189423	1.82505	660.025	1414.42		6.3944	0.404458
19		88.4	0.0476773	0.00177945	0.282786	1.24013e-05	1.23776	3.09773	625.259	1300.15		6.8547	0.140397
MME (GF-03)
1		84	0.0331764	0.00115922	0.282779	1.13937e-05	-0.196011	1.57663	672.522	1420		6.67338	0.189317
2		89	0.0224049	0.000744692	0.282847	9.67912e-06	2.18072	4.11435	570.659	1195		6.64895	0.283966
3		87.5	0.0424236	0.00136636	0.282828	1.18844e-05	1.51181	3.3761	607.244	1261		7.19552	0.230218
4		85.9	0.0466938	0.00174748	0.282777	1.53593e-05	-0.299509	1.50786	687.47	1430		6.53624	0.294039
5		86.3	0.051478	0.00181321	0.282812	1.20012e-05	0.965265	2.77891	636.981	1315		6.59908	0.256969
8		85.5	0.0442938	0.00143987	0.282778	1.27376e-05	-0.243768	1.57234	679.529	1424		6.75716	0.24831
9		85.6	0.0417696	0.0013601	0.282844	1.16656e-05	2.08582	3.91031	583.928	1211		6.81452	0.19427
10		84.9	0.0398534	0.00133612	0.282826	1.25218e-05	1.46053	3.27166	608.823	1269		6.67937	0.282206
12		84.7	0.0411438	0.00133662	0.282798	1.43624e-05	0.473069	2.27909	648.714	1359		6.89531	0.176273
13		86.7	0.0209213	0.000697862	0.282872	1.11528e-05	3.08355	4.97046	534.056	1115		6.5881	0.244852
14		86.7	0.045825	0.00149071	0.282857	1.17669e-05	2.55379	4.39321	566.985	1168		6.5522	0.21026
15		86.4	0.036906	0.00124498	0.282863	1.36601e-05	2.75229	4.60105	555.247	1149		6.58013	0.327939
16		84.1	0.0418139	0.00141817	0.282482	9.98589e-06	-10.7179	-8.9319	1101.05	1376.5		8.03434	0.200312
17		87.1	0.0646827	0.00230607	0.282529	1.24258e-05	-9.03747	-7.23855	1058.76	1292.29		7.92313	0.32389
18		85.5	0.0824123	0.00293785	0.282505	1.33085e-05	-9.89064	-8.15997	1113.13	1337.8		8.1655	0.214987
19		88.9	0.0297738	0.00099634	0.282578	1.13296e-05	-7.30835	-5.39421	953.293	1199.95		8.0897	0.285762
20		86.5	0.0983146	0.00365779	0.282484	1.2079e-05	-10.6559	-8.9463	1168.61	1378.42		7.70919	0.220012
εHf(0) = [(176Hf/177Hf)S/(176Hf/177Hf)CHUR -1]×10000; εHf(t) = {[(176Hf/177Hf)S-(176Lu/177Hf)S×(eλt-1)]/[(176Hf/177Hf)CHUR-(176Lu/177Hf)CHUR×(eλt-1)] -1}×10000;
TDM = (1/λ)×ln{1 + [(176Hf/177Hf)S - (176Hf/177Hf)DM]/[(176Lu/177Hf)S – (176Lu/177Hf)DM]};
TDMC = TDM – (TDM – t)(fC – fS)/( fC – fDM);
fLu/Hf = (176Lu/177Hf)/(176Lu/177Hf)CHUR -1;
λ = 1.867×10-11 year-1 (Soderlund et al., 2004);
Subscript S = analyzed zircon sample, CHUR = chondritic uniform reservoir, C = continental crust, and DM = depleted mantle; t = zircon U-Pb age;
176Hf/177HfDM = 0.28325, 176Lu/177HfDM = 0.0384 (Griffin et al., 2000); 176Hf/177HfCHUR = 0.282772; 176Lu/177HfCHUR = 0.0332 (Blichert-Toft and Albarede, 1997);
Hf model ages (TDMC) are dependant on the choice of the 176Lu/177Hf ratio of the crust which is highly variable between the upper and lower crust.
For zircons from MMEs , the mafic lower crust 176Lu/177Hf value of 0.022 (Amelin et al., 1999) is used;
For zircons from granitic rocks, the upper crust 176Lu/177Hf value of 0.0093 (Amelin et al., 1999) is used.
Xenocrystic zircons are marked in italic.
